# Supplementary material for: Fluorescent G-quadruplex–NMM DNA probe for the detection of silver nanoparticles in aqueous media
Source: Royal Society of Chemistry journal article supplement (doi:10.1039/c4ay03062a), 2015-01-01
Supplement: c4ay03062a1.pdf [file c4ay03062a1.pdf]

Electronic Supplementary Information

**Fluorescent G-Quadruplex-NMM DNA Probe for Detection  
of Silver Nanoparticles in Aqueous Media**

Shengmin Xu<sup>a\*</sup>, Yajun Zhang<sup>a</sup>, Xun Luo<sup>a</sup>, Yichen Wang<sup>a</sup>, Shaopeng Chen<sup>a</sup>, Jun

Wang<sup>a</sup>, Hang Yuan<sup>a</sup>, An Xu<sup>a</sup> and Lijun Wu<sup>a,b\*</sup>

<sup>a</sup>Key Laboratory of Ion Beam Bioengineering, Hefei Institutes of Physical Science,  
Chinese Academy of Sciences and Anhui Province, Hefei, Anhui 230031, P.R. China.

<sup>b</sup>School of Nuclear Science and Technology, University of Science and Technology  
of China, Hefei, Anhui 230026, P.R. China

\*Corresponding authors, Tel: +86-551-5591602, Fax: +86-551-5595670

Email: shmxu@mail.ustc.edu.cn & ljw@ipp.ac.cn

## Experimental Section

**Materials and Reagents.** The purified G-quadruplexes oligonucleotide (G-DNA: 5'-TGGGTAGGGCGGGTTGGGAAA-3') was synthesized by Sangon Biotech. Co., Ltd. (Shanghai, China). The stock solution of G-DNA (100  $\mu\text{M}$ ) was prepared in 10 mM Tris-Ac, 1 mM EDTA buffer (pH 8.0) and stored at  $-20\text{ }^{\circ}\text{C}$  before use. NMM and different size citrate-stabilized AgNPs were obtained from Sigma-Aldrich (China). The used metal salts were purchased from Sinopharm Group Chemical Reagent (Shanghai, China). All aqueous solutions were prepared with ultrapure water.

**Detection of  $\text{Ag}^+$  Based on G-DNA-NMM Probe.** 250  $\mu\text{L}$  of G-DNA (0.8  $\mu\text{M}$ ) was prepared in 20 mM Tris-Ac, 4 mM EDTA buffer (pH 8.0) and heated to  $90\text{ }^{\circ}\text{C}$  for 5 min. 250  $\mu\text{L}$  different concentrations of  $\text{Ag}^+$  was then added to this solution and cooled slowly to room temperature for 30 min. After that, 1 mM of KAc and 0.05 % of Triton X-100 was added and the mixture was incubated for another 30 min to form G-quadruplex structures. Finally, the 1  $\mu\text{M}$  of NMM was added and the fluorescent spectra of mixture were recorded with a Cary Eclipse spectrophotometer (Varian, Inc.) with the following settings: excitation wavelength = 399 nm, excitation slit = 10 nm, emission slit = 5 nm.

**Detection of AgNPs Based on G-DNA-NMM Probe.** Oxidation reaction of AgNPs to  $\text{Ag}^+$  was performed under acidic condition with  $\text{H}_2\text{O}_2$  [24]. A solution of AgNPs (10 nm, 20 nm, or 100 nm) was added to a solution of 1 mM  $\text{H}_2\text{O}_2$  and 1  $\mu\text{M}$   $\text{H}_3\text{PO}_4$ , and incubated at room temperature for 30 min. The resulting solution was directly added to the heated G-DNA solution and incubated for another 30 min. After that, 1

mM of KAc and 0.05 % of Triton X-100 was added to allow the G-DNA to form G-quadruplex structures. Finally, 1  $\mu\text{M}$  of NMM was added and the fluorescence of mixture was recorded with a Cary Eclipse spectrophotometer (Varian, Inc.).

**Preparation of G-DNA-hemin complexes modulated by  $\text{Ag}^+$ , AgNPs, or  $\text{H}_2\text{O}_2$ .**

The G-DNA-hemin complexes were prepared following the procedures described in the literature with little modified. Briefly, G-DNA was prepared in 10 mM Tris-Ac buffer (pH = 8.0) containing 5 mM KAc and 0.01% Triton X-100. The DNA solution was heated to 90  $^\circ\text{C}$  for 5 min and then cooled slowly to room temperature. To this solution was added different concentrations of  $\text{Ag}^+$ , AgNPs or  $\text{H}_2\text{O}_2$  and incubated for another 30 min at room temperature. Then, hemin (0.5  $\mu\text{M}$ ) was added to the mixture and held for 1 h. After that, ABTS (2 mM) and  $\text{H}_2\text{O}_2$  (2 mM) was added and the absorbance at 420 nm of the reaction product  $\text{ABTS}^+$  was recorded by UV-vis spectrophotometer.

**Analysis of Environmental Water Sample.** We collected water sample from Dongbu Reservoir (Hefei, China). AgNPs samples were prepared with standard solutions of AgNPs. Then, the samples were oxidized to  $\text{Ag}^+$  with a solution of 1 mM  $\text{H}_2\text{O}_2$  and 1  $\mu\text{M}$   $\text{H}_3\text{PO}_4$ . The resulting solution was directly added to the heated G-DNA solution and incubated for another 30 min. After that, 1 mM of KAc and 0.05 % of Triton X-100 was added to allow the G-DNA to form G-quadruplex structures. Finally, 1  $\mu\text{M}$  of NMM was added and the fluorescence of mixture was recorded with a Cary Eclipse spectrophotometer.

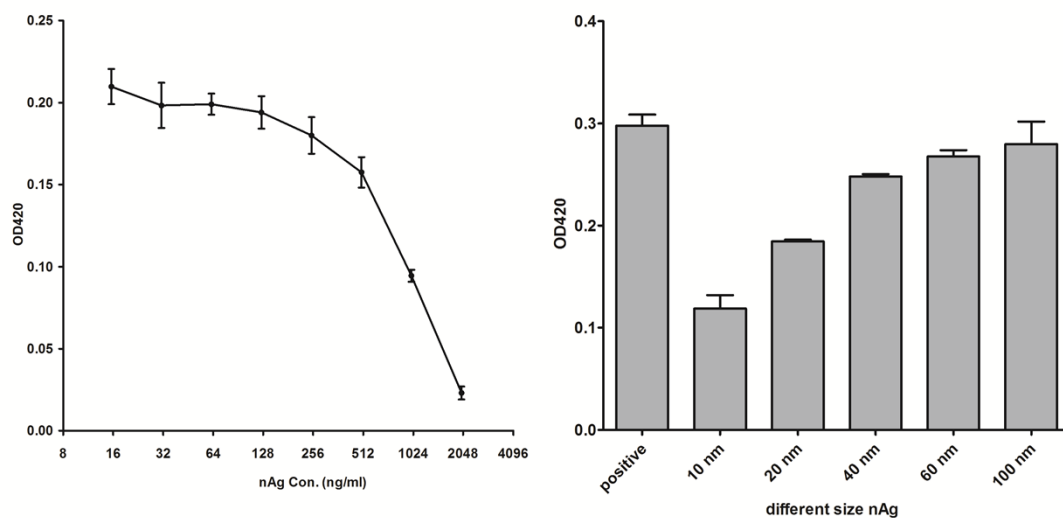

Fig. S1

**Fig. S1** Inhibition of the peroxidase activity of G-DNA-hemin by different sizes of AgNPs (4  $\mu$ M).

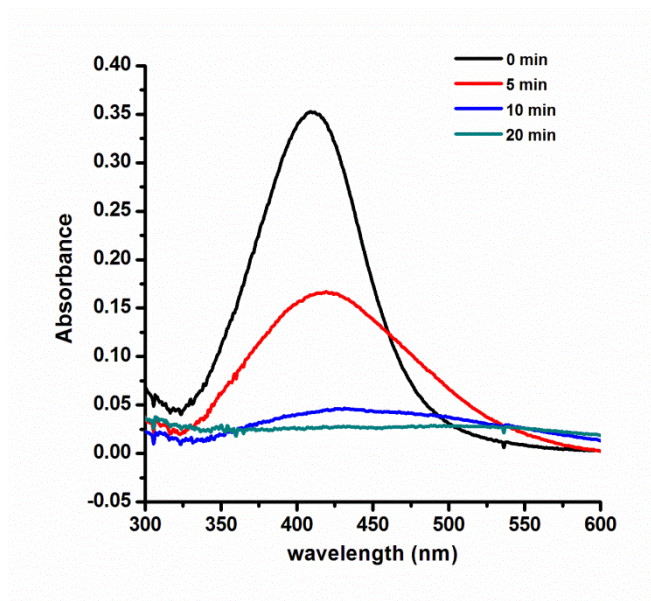

Fig. S2

**Fig. S2** Time-dependence of the equilibration of AgNPs (20 nm) to Ag<sup>+</sup> ions by H<sub>2</sub>O<sub>2</sub> under acid condition.

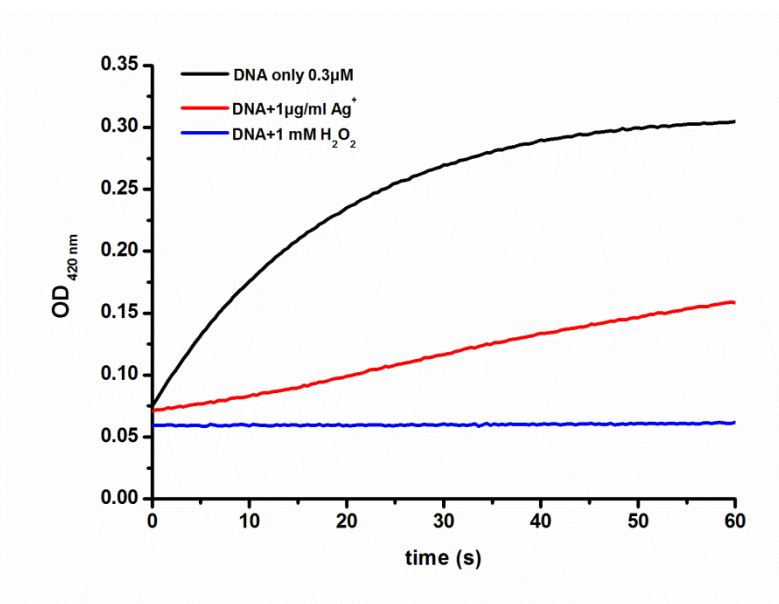

Fig. S3

**Fig. S3** Kinetics curves for the ABTS-H<sub>2</sub>O<sub>2</sub> reactions catalyzed by the G-DNA-hemin complex after incubated with Ag<sup>+</sup> (1 μg/ml) or H<sub>2</sub>O<sub>2</sub> (1 mM).

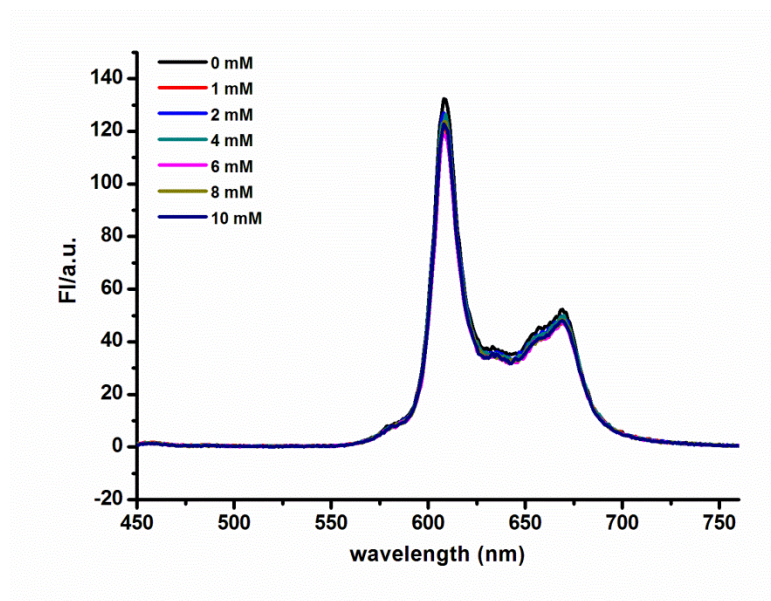

Fig. S4

**Fig. S4** Fluorescence spectra of G-DNA-NMM (1 μM) on the addition of different concentrations of H<sub>2</sub>O<sub>2</sub> (0-10 mM).

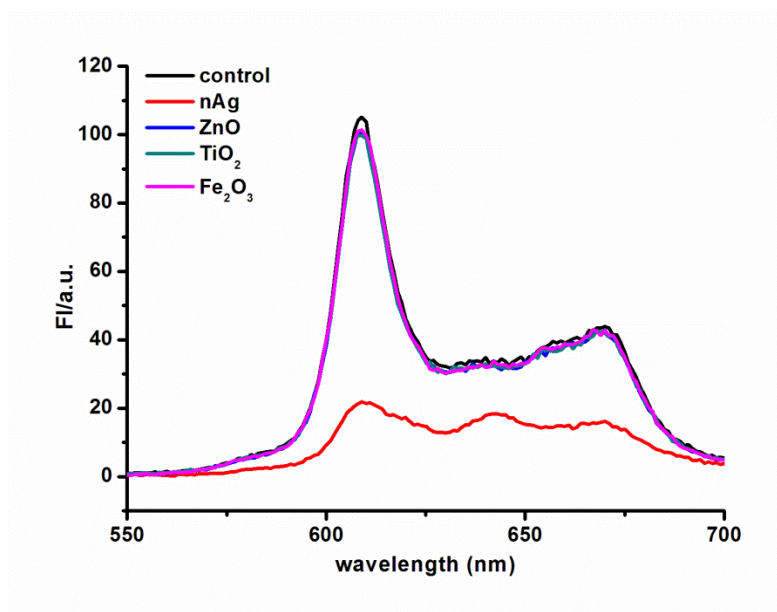

Fig. S5

**Fig.S5** Fluorescence spectral changes of G-DNA-NMM (0.4  $\mu\text{M}$ ) on the addition of other nanoparticles (1  $\mu\text{g/ml}$ ), which has been treated with 1.0 mM  $\text{H}_2\text{O}_2$  and 1.0  $\mu\text{M}$   $\text{H}_3\text{PO}_4$ . ZnO, 20 nm;  $\text{TiO}_2$ , 20 nm;  $\text{Fe}_2\text{O}_3$ , 20 nm.
